# Supplementary material for: Risk and Resources: An Evaluation of the Ability of National Soil Datasets to Predict Post-Depositional Processes in Archaeological Sites and Heritage at Risk
Source: MDPI journal article supplement (doi:10.3390/heritage4020041), 2021-05-08
Supplement: s1 [file s1]

Archive with 1 entries (1 files):
- heritage-1170724-supplementary.pdf
