# Supplementary material for: Risk and Resources: An Evaluation of the Ability of National Soil Datasets to Predict Post-Depositional Processes in Archaeological Sites and Heritage at Risk
Source: MDPI journal article supplement (doi:10.3390/heritage4020041), 2021-05-08
Supplement: s1 [file s1 › heritage-1170724-supplementary.pdf]

## Supplementary Material

### List of search terms used in analysis of excavation literature

- Hyphens not included in search terms (except on occasional variations of spelling – e.g. thin-section)
- Hyphens used to denote where word could have multiple endings (e.g. searching for 'sampl' could produce results for sampling, sample, samples, sampled etc.)

#### Analysis:

- |                      |                                |
|----------------------|--------------------------------|
| • Soil / sediment    | • Micromorph- / thin(-)section |
| • Sampl-             | • Magnetic                     |
| • Organic / loss-    | • Grid                         |
| • Phosph-            | • Bulk / chemical              |
| • Floor / occupation |                                |

#### Site formation processes:

- |                                                               |                                                                  |
|---------------------------------------------------------------|------------------------------------------------------------------|
| • Erosion / erod-                                             | • Preserv- / bone                                                |
| • Wind / (a)eolian / blow / sand                              | • Intrusi-                                                       |
| • Water / fluvi- / flood / alluvi- / wave                     | • Scaveng- / gnaw / animal / faec- / dung                        |
| • Slop- / colluvi- / hill(-)wash / slump / tumble / creep     | • Clean- / sweep- / traml- / discard                             |
| • pH / acid- / alkali-                                        | • Cropmark / agriculture / cultivat- / burn- / plough            |
| • Formation / process                                         | • Collapse / decay / abandon- / robb- / reuse / damag- / degrad- |
| • Leach- / translocat- / pan / iron(-) / downward / percolat- | • Fragment-                                                      |
| • Turbation / worm / burrow / root / tree                     | • Frost / freez-                                                 |
| • Cut / truncat- / disturb-                                   |                                                                  |
